# Supplementary material for: Carbon nanotube reinforced self-healable polythiourethane with excellent bonding strength and improved thermal conductivity
Source: Royal Society of Chemistry journal article supplement (doi:10.1039/d2qm00343k), 2022-01-01
Supplement: d2qm00343k1.pdf [file d2qm00343k1.pdf]

## Supplementary Material

### Carbon Nanotubes Reinforced Self-healable Polythiourethane with Excellent Bonding Strength and Improved Thermal Conductivity

*Ji-yuan Shen<sup>1#</sup>, Wei Hu<sup>2,3##</sup>, Chang Sun<sup>4</sup>, Shuo-ning Zhang<sup>3</sup>, Lan-ying Zhang<sup>3</sup>, Jin-ying Bao<sup>3</sup>, Yun-xiao Ren<sup>2</sup>, Ya-ping Cao<sup>3</sup>, Rui Huang<sup>4</sup>, Hui Li<sup>4</sup>, Jiu-mei Xiao<sup>1\*</sup>, Huai Yang<sup>2,3,5\*</sup>*

<sup>1</sup> Department of applied mechanics, University of sciences and technology Beijing, Beijing 100083, China.

<sup>2</sup> Institute for Advanced Materials and Technology, University of Science and Technology Beijing, Beijing 100083, China.

<sup>3</sup> School of Materials Science and Engineering, Peking University, Beijing 100871, China.

<sup>4</sup> Department of Materials Physics and Chemistry, School of Materials Science and Engineering, University of sciences and technology Beijing, Beijing 100083, China.

<sup>5</sup> Key Laboratory of Polymer Chemistry and Physics of Ministry of Education, Peking University, Beijing 100871, China.

<sup>#</sup>These authors contributed equally to this work.

**CONDUCT (corresponding authors' emails):**

\*Wei Hu: [huwei@ustb.edu.cn](mailto:huwei@ustb.edu.cn); Jiumei Xiao: [jiujiu@sas.ustb.edu.cn](mailto:jiujiu@sas.ustb.edu.cn); Huai Yang: [zhanglanying@pku.edu.cn](mailto:zhanglanying@pku.edu.cn)

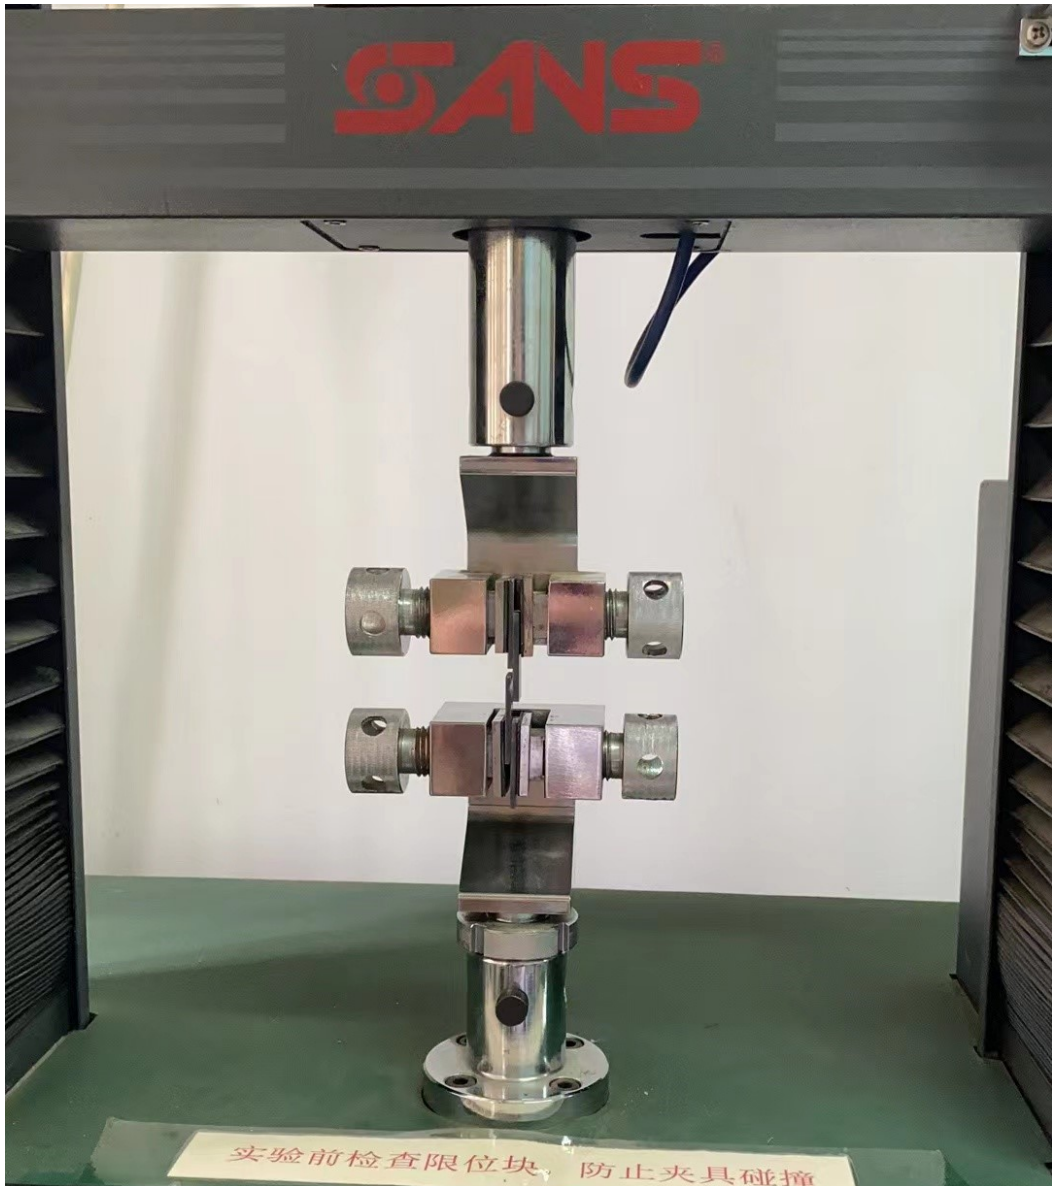

**Figure S1.** Testing of electro-mechanical universal testing machine and lap mode of the bonding samples.

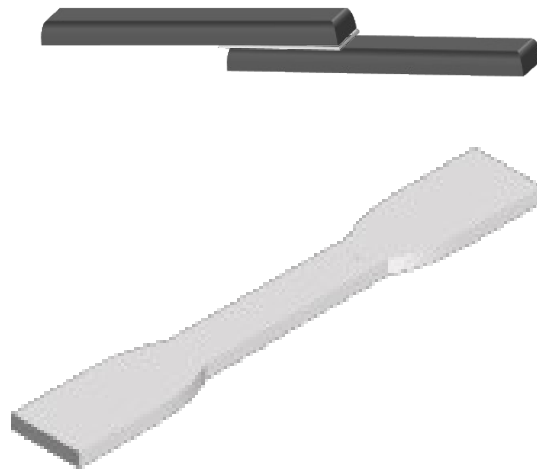

**Figure S2.** The lap shear samples and tensile samples.

**Preparation method of tensile samples:** Take two bonded test specimens with surface treatment, the lap shear sample to be tested evenly in the areas of  $10\text{ mm} \times 10\text{ mm}$ , and fit the two. A  $100\text{ }\mu\text{m}$  spacer was placed in the gap to control the thickness. Finally, a heavy weight is placed above the specimen to ensure that the bonding surface is completely attached.

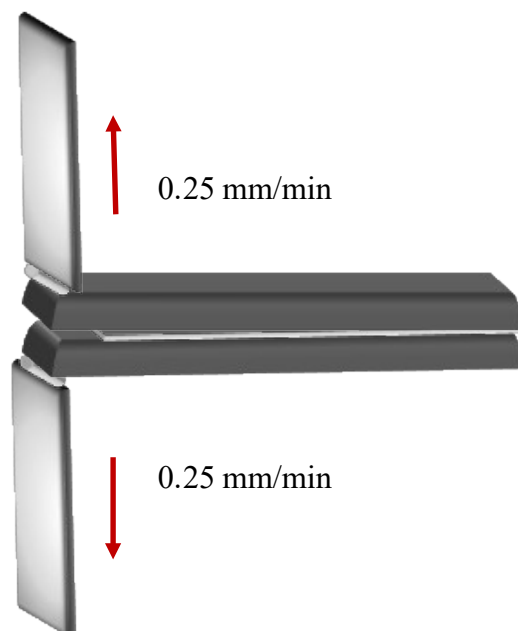

**Figure S3.** The test samples of DCB.

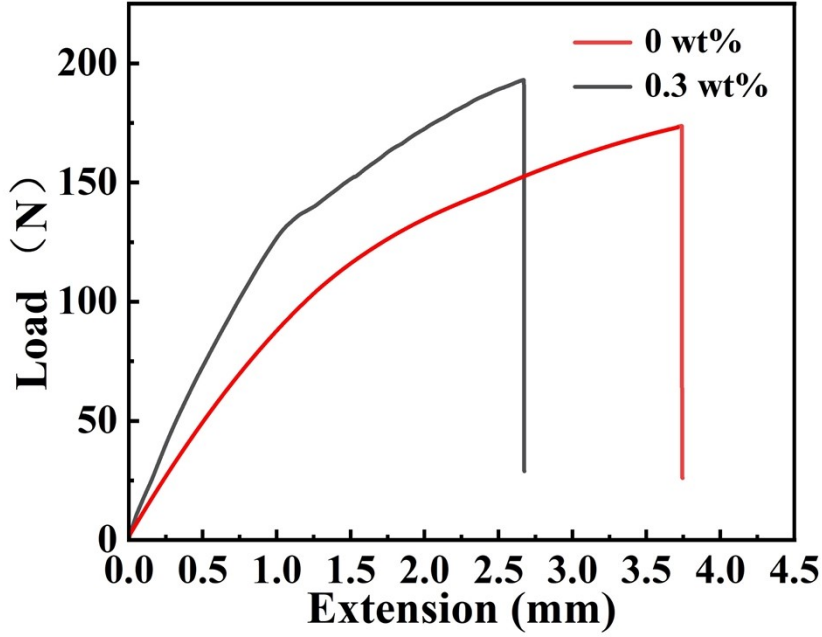

**Figure S4.** Load-extension curves measured by DCB samples.

The strain energy release rate  $G_C$  was calculated using Eq. S1 for the 3M 2665, Locite 3542, 0 wt% and 0.3 wt% of the doping contents of the TMXDI-modified CNTs adhesive. Here,  $P$  is the applied load,  $b$  is the specimen width,  $C$  is the compliance of the specimen, and  $a$  is the crack length. The term  $C$  can be expressed as Eq. S2, where  $\delta$  is the extension on the load line and  $P$  is the applied load.

$$G_C = \frac{P^2 dC}{2bda} \quad (\text{Eq. S1})$$

$$C = \frac{\delta}{P} \quad (\text{Eq. S2})$$

北京科大分析检验中心有限公司

## 检测报告

(2021)科测(L/N)第0163号

|       |                    |                 |      |
|-------|--------------------|-----------------|------|
| 客户名称  | 北京科技大学             |                 |      |
| 客户地址  | 北京市海淀区学院路30号北京科技大学 | 邮政编码            | ——   |
| 委托人   | 联系电话               | ——              | 传真   |
|       | E-mail             | ——              |      |
| 样品情况  | 委托单号               | 2021100059      | 委托日期 |
|       | 样品名称               | 粘接试样            | 样品状态 |
|       | 样品数量               | 1件              | 样品来源 |
| 检测项目  | 检测名称               | 金属材料室温拉伸试验      |      |
|       | 检测要求               | 剪切强度            |      |
|       | 检测依据               | GB/T 228.1-2010 |      |
| 检测结果  | 检测结果见下页            |                 |      |
| 备注    | 以下结果仅供科研使用         |                 |      |
| 检测专用章 | 编制人                | 刘清欣             |      |
|       | 校核人                | 郝琳              |      |
|       | 签发人                | 刘至可             |      |
|       | 检测日期               | 2021年10月18日     |      |
|       | 完成日期               | 2021年10月19日     |      |

北京科大分析检验中心有限公司  
检测结果

(2021)科测(L/N)第0163号

|                 |          |    |
|-----------------|----------|----|
| 样品编号<br>(批号-原号) | 剪切强度/MPa | 备注 |
| 批号 I012110059   |          |    |
| 一 样品原号          |          |    |
| — 1-3           | 12.2     | —— |
| 以下空白            |          |    |

Figure S5. The report of mechanical properties test.

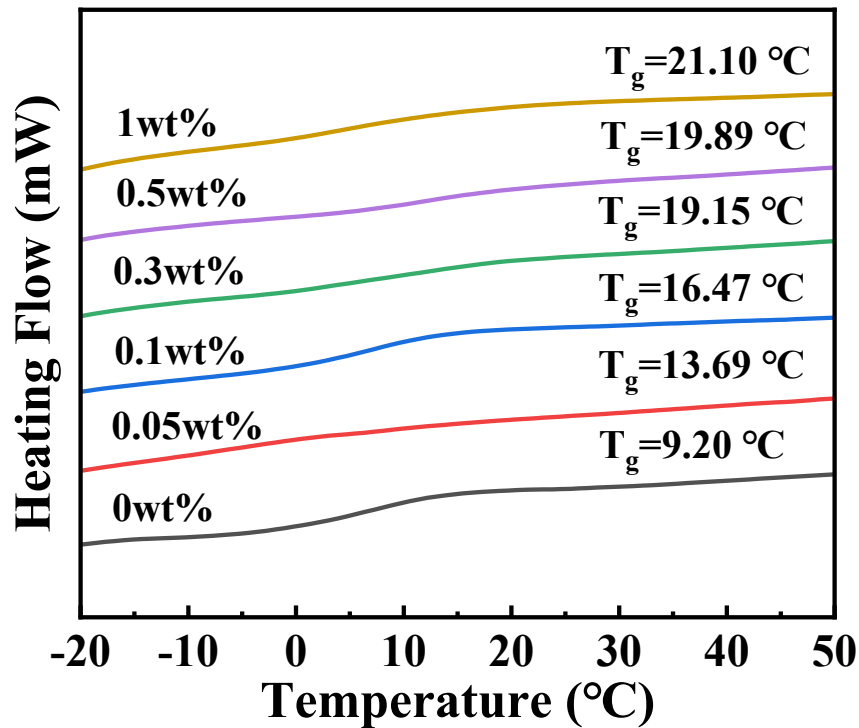Figure S6. Glass transition temperature ( $T_g$ ) of samples with different contents.

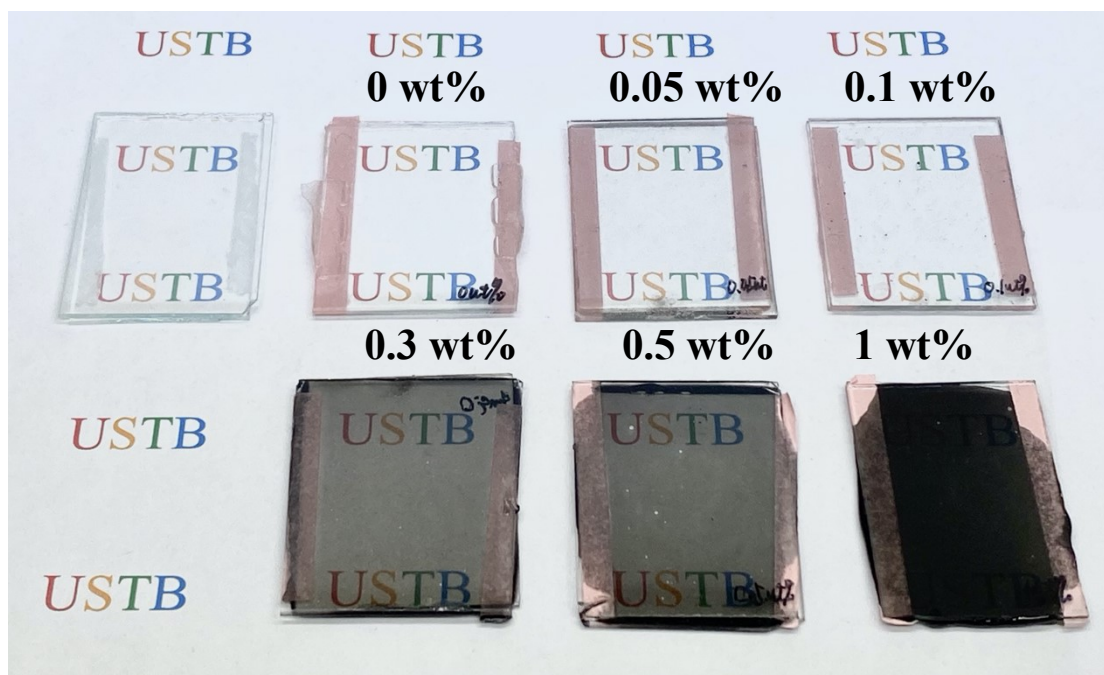

**Figure S7.** The optical performance test samples.
